# Supplementary material
Source: PubMed Central journal article supplement (PMC2990210)

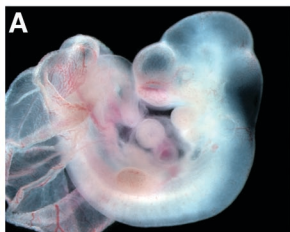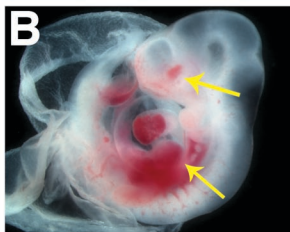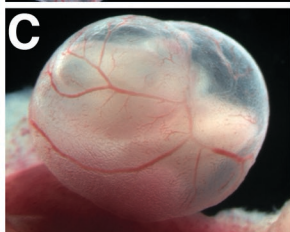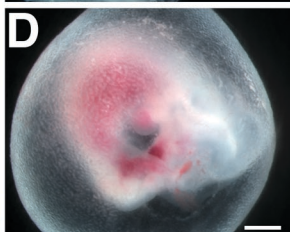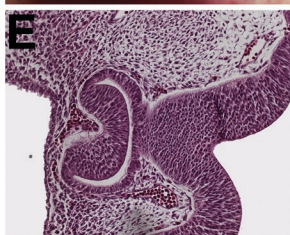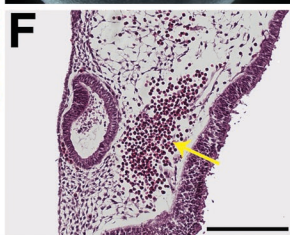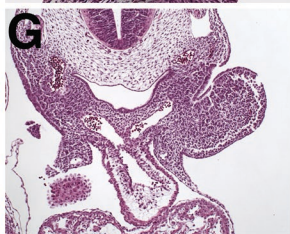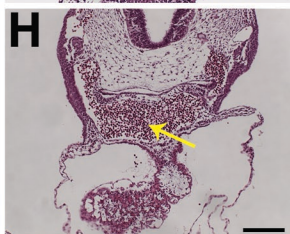

Control

endothelial Jag1 cko

Supplement: supp_dev.052043_DEV052043FigS1.pdf [file supp_dev.052043_DEV052043FigS1.pdf]

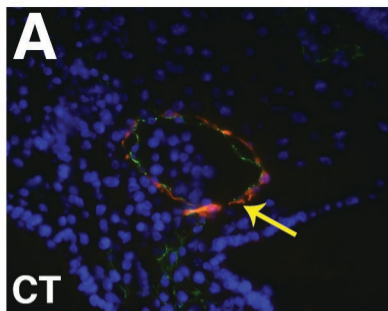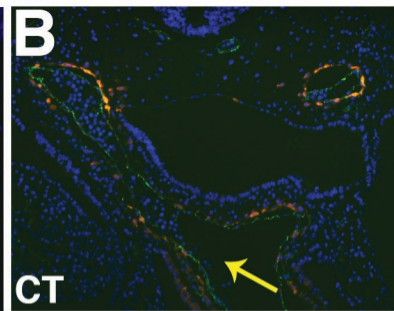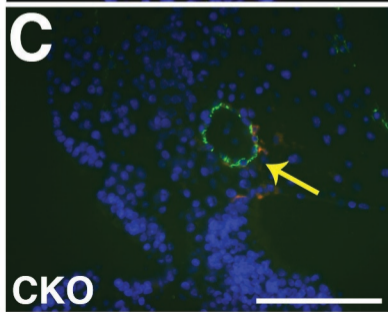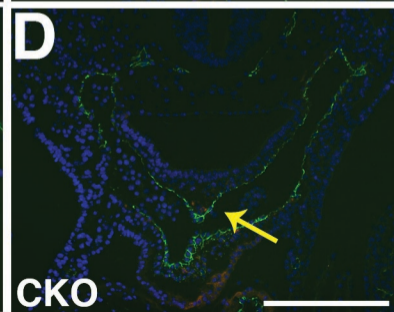

Supplement: supp_dev.052043_DEV052043FigS2.pdf [file supp_dev.052043_DEV052043FigS2.pdf]

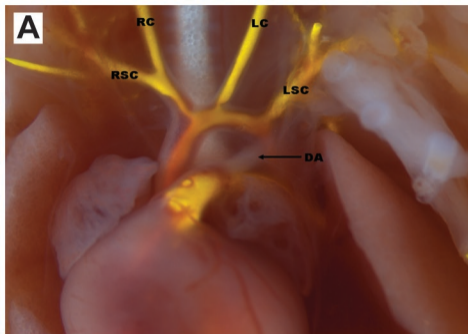

**Control**

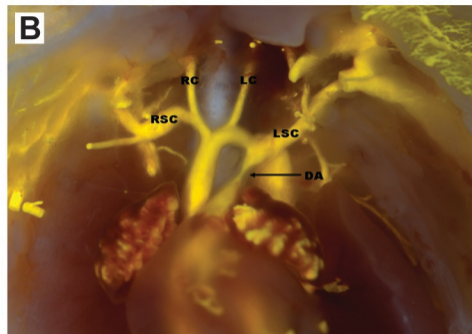

**Jag1-SMcko**

Supplement: supp_dev.052043_DEV052043FigS3.pdf [file supp_dev.052043_DEV052043FigS3.pdf]

**E14.5****E15.5**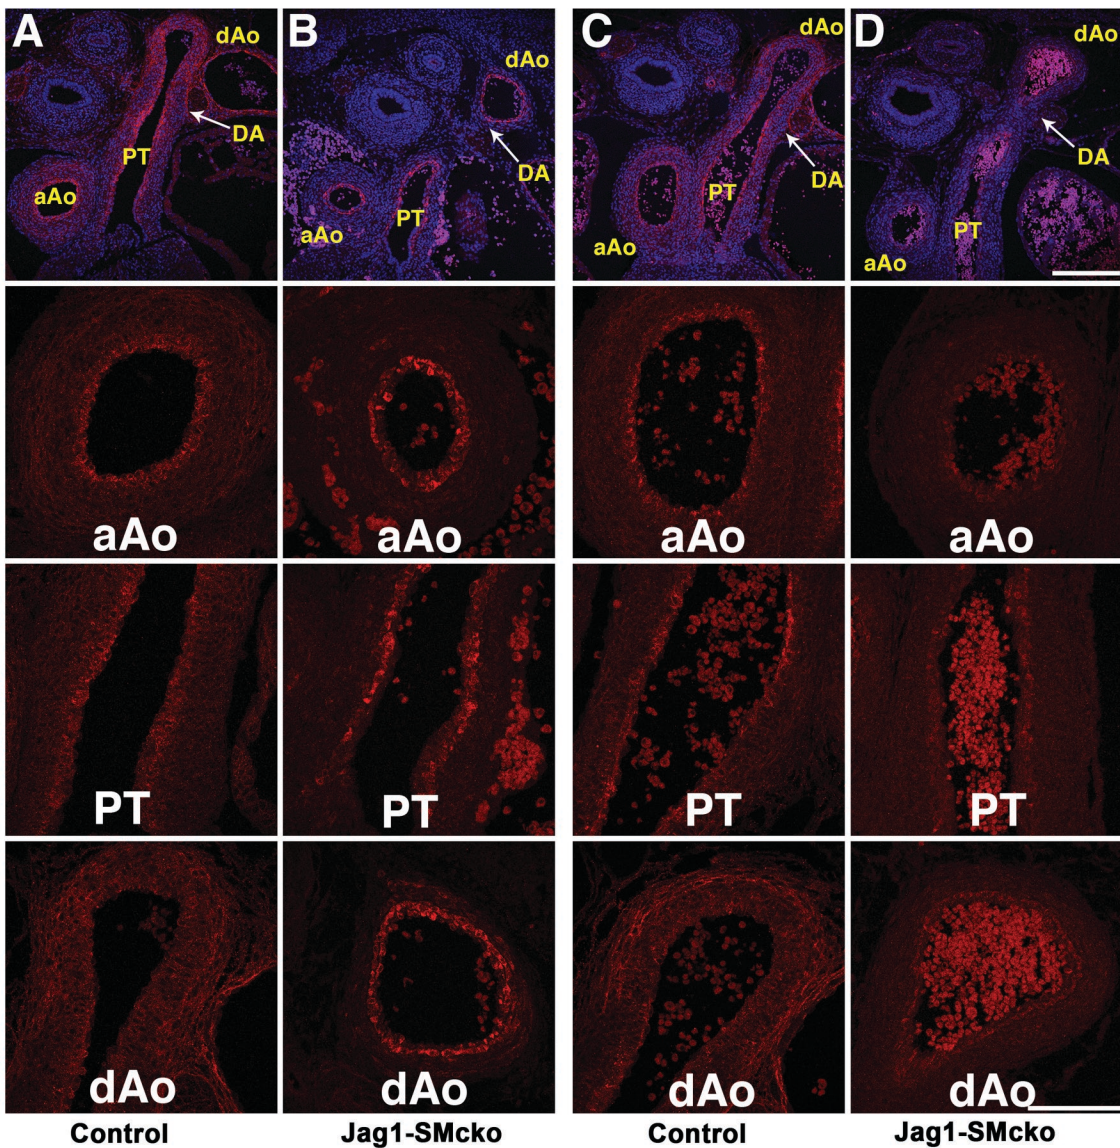

Supplement: supp_dev.052043_DEV052043FigS4.pdf [file supp_dev.052043_DEV052043FigS4.pdf]

E13.5

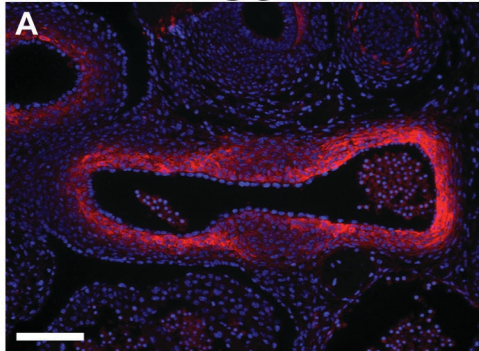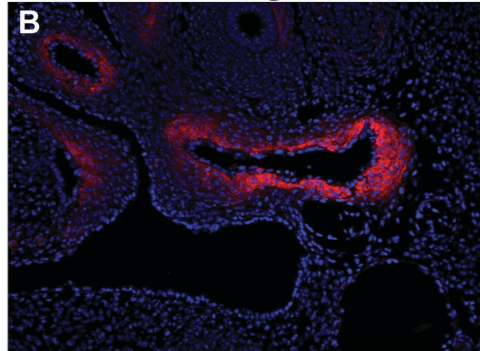

E17.5

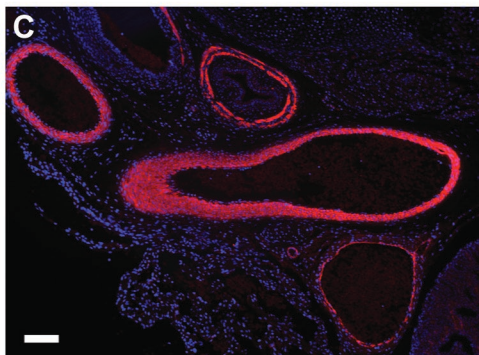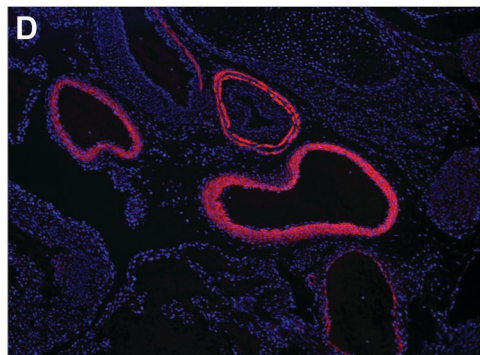

Control

Jag1-SMcko

Supplement: supp_dev.052043_DEV052043FigS5.pdf [file supp_dev.052043_DEV052043FigS5.pdf]

# Untreated

# Indomethacin-injected

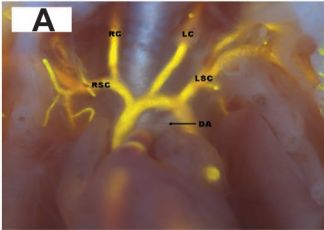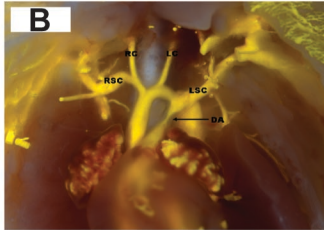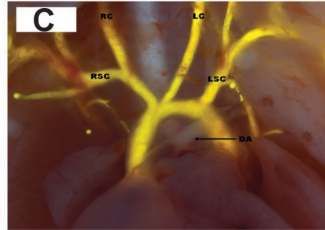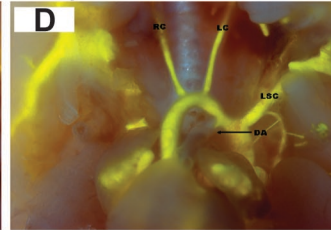

**Control**

**Jag1-SMcko**

**Control**

**Jag1-SMcko**

Supplement: supp_dev.052043_DEV052043FigS6.pdf [file supp_dev.052043_DEV052043FigS6.pdf]
